# Supplementary material
Source: publisher site journal article supplement (https://www.spandidos-publications.com/929/downloadSupplementary)

Figure S1. Effects of Pdn on levels of CD14 transcripts. After serum starvation, THP-1 cells were treated for 48 h with indicated amount of Pdn in the presence of 27OHChol. Levels of CD14 transcripts were assessed by quantitative PCR. The y-axis values represent the increases of CD14 mRNA levels normalized to GAPDH levels, relative to that of the non-treated THP-1 cells (control). Data are presented as the mean  $\pm$  SD (n=3 replicates for each group). \*\*\*P<0.001 vs. control. Pdn, prednisolone.

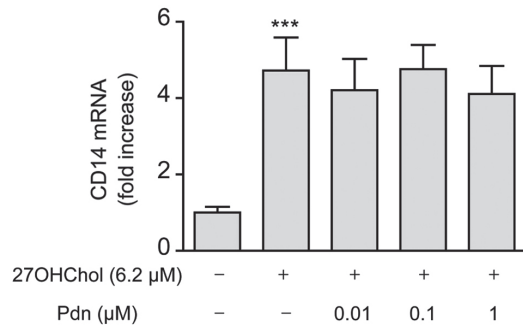

Figure S2. Effects of Pdn on CCL2 production in response to LPS in the presence of 27OHChol. Serum-starved THP-1 cells were cultured for 24 h with 27OHChol in the presence of Pdn, followed by stimulation for 9 h with or without LPS. Levels of CCL2 transcripts were assessed by quantitative PCR. Data are presented as the mean  $\pm$  SD (n=3 replicates for each group). \*P<0.05 vs. control; +++P<0.001 vs. 27OHChol; ##P<0.01 vs. 27OHChol+LPS; ###P<0.001 vs. 27OHChol+LPS. Pdn, prednisolone; LPS, lipopolysaccharide; CCL2, chemokine ligand 2.

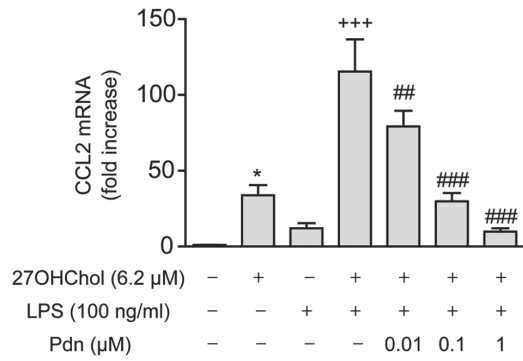

Figure S3. Effects of 27OHChol and Pdn on CD68 expression. Serum-starved THP-1 cells were treated for 48 h with 27OHChol in the absence or presence of Pdn. (A) Transcripts of CD68 were amplified by reverse transcription PCR. (B) Relative CD68 band intensity was semi-quantified by normalizing to  $\beta$ -actin. Data are presented as the mean  $\pm$  SD (n=3 replicates for each group). Pdn, prednisolone.

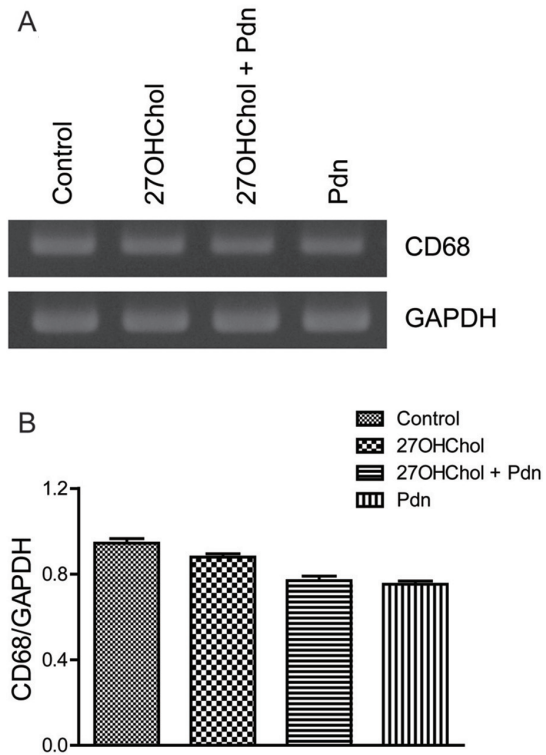

Supplement: Supplementary file [file downloadSupplementary]
